# Supplementary material for: Serum concentration of extracellular cold-inducible RNA-binding protein is associated with respiratory failure in COVID-19
Source: PubMed Central journal article supplement (PMC9373926; doi:10.3389/fimmu.2022.945603), 2022-07-29

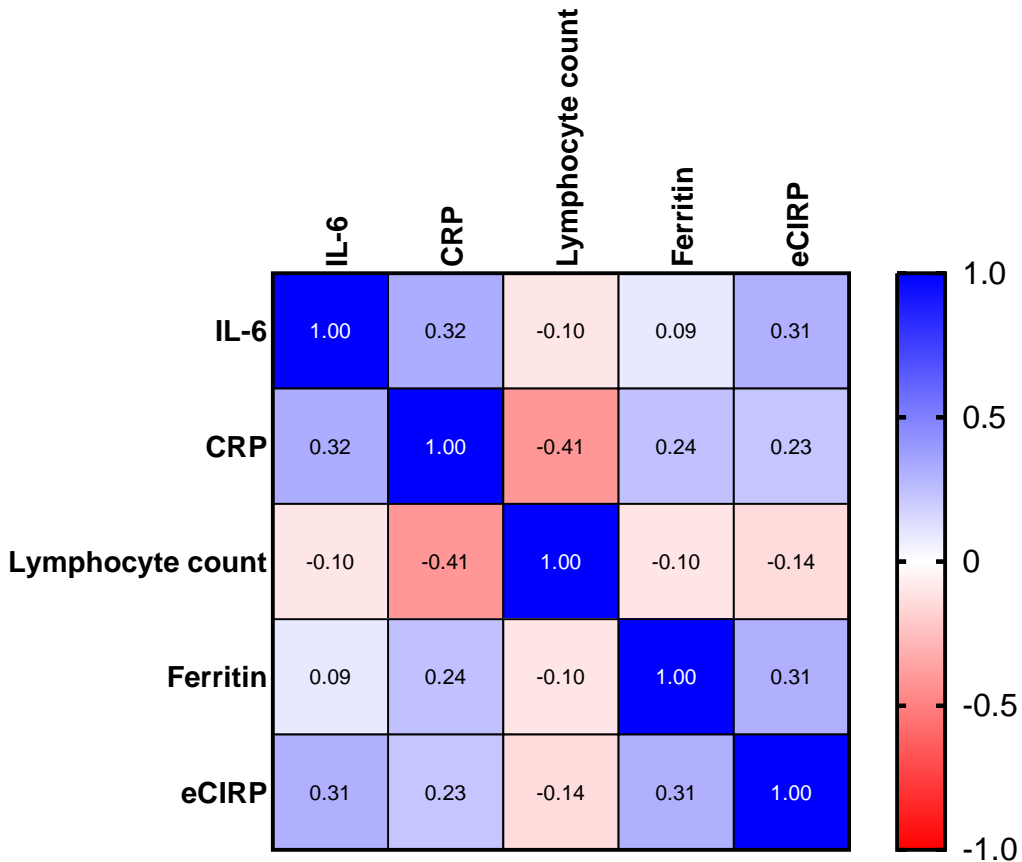

Supplement: Image_1.pdf [file Image_1.pdf]
